# Supplementary material
Source: Research Square preprint supplement (doi:10.21203/rs.3.rs-9130955/v1)
Supplement: Supplementary file 1 [file 741c4500bf4a5db9e135c72e.pdf]

## SOCIODEMOGRAPHIC QUESTIONNAIRE FOR HEALTHCARE PROFESSIONALS

This is a voluntary, anonymous, and confidential questionnaire. No answer is considered right or wrong. Please mark an "X" in the corresponding option(s). Remember, you may choose more than one option.

|                                                                              |                         |             |              |                      |          |
|------------------------------------------------------------------------------|-------------------------|-------------|--------------|----------------------|----------|
| <b>AGE:</b>                                                                  | 20 – 24 Yrs             | 25 – 29 Yrs | 30 – 39 Yrs  | 40 – 49 Yrs          | ≥ 50 Yrs |
| <b>SEX:</b>                                                                  | Male                    |             | Female       |                      |          |
| <b>YEARS OF SERVICE:</b>                                                     | 0 – 4 Yrs               | 5 – 9 Yrs   | 10 – 14 Yrs  | 15 – 19 Yrs          | ≥ 20 Yrs |
| <b>EDUCATION:</b>                                                            | Medium-level technician | Bachelor's  | Master's     | Doctorate            | Other    |
| <b>PROFESSIONAL AREA:</b>                                                    | Psychologist            | Physician   | Psychiatrist | Technician           | Nurse    |
| <b>MARITAL STATUS:</b>                                                       | Single                  | Cohabiting  | Married      | Divorced / Separated | Widowed  |
| <b>TYPE OF PATIENTS YOU ATTEND:</b>                                          | Child                   | Adolescent  | Adult        | Elderly              | All      |
| <b>Have you ever heard of stress or burnout syndrome?</b>                    | Yes                     | No          |              |                      |          |
| <b>To what extent does your occupational stress affect your performance?</b> | Never                   | Rarely      | Sometimes    | Frequently           | Always   |
| <b>Have you ever felt the need to see a psychologist?</b>                    | Yes                     | No          |              |                      |          |

## BURNOUT QUESTIONNAIRE FOR HEALTHCARE PROFESSIONALS

Below you will find a set of statements that describe different feelings you may have regarding your work. Please indicate how often in the last 30 days you have felt this way in your work by marking an “X” on the number that best describes your situation, following the two scales presented below. Some statements are scored as 1 – totally disagree to 5 – totally agree, while others are scored inversely: 5 – totally disagree to 1 – totally agree.

|                         |                 |                                   |              |                      |
|-------------------------|-----------------|-----------------------------------|--------------|----------------------|
| <b>1</b>                | <b>2</b>        | <b>3</b>                          | <b>4</b>     | <b>5</b>             |
| <b>TOTALLY DISAGREE</b> | <b>DISAGREE</b> | <b>NEITHER AGREE NOR DISAGREE</b> | <b>AGREE</b> | <b>TOTALLY AGREE</b> |

| <b>N</b> | <b>STATEMENTS</b>                                                                    | <b>1</b> | <b>2</b> | <b>3</b> | <b>4</b> | <b>5</b> |
|----------|--------------------------------------------------------------------------------------|----------|----------|----------|----------|----------|
| 01       | There are days when I feel tired even before arriving at work                        |          |          |          |          |          |
| 02       | Increasingly, I speak negatively about my work                                       |          |          |          |          |          |
| 03       | After work, I need more time to relax and feel better than I used to                 |          |          |          |          |          |
| 04       | Lately I have been thinking less about my work and I do my tasks almost mechanically |          |          |          |          |          |
| 05       | I consider my work a positive challenge                                              |          |          |          |          |          |
| 06       | Sometimes I feel fed up with my tasks at work                                        |          |          |          |          |          |
| 07       | After work I feel tired and without energy                                           |          |          |          |          |          |

|                         |                 |                                   |              |                      |
|-------------------------|-----------------|-----------------------------------|--------------|----------------------|
| <b>5</b>                | <b>4</b>        | <b>3</b>                          | <b>2</b>     | <b>1</b>             |
| <b>TOTALLY DISAGREE</b> | <b>DISAGREE</b> | <b>NEITHER AGREE NOR DISAGREE</b> | <b>AGREE</b> | <b>TOTALLY AGREE</b> |

| <b>N</b> | <b>STATEMENTS</b>                                          | <b>5</b> | <b>4</b> | <b>3</b> | <b>2</b> | <b>1</b> |
|----------|------------------------------------------------------------|----------|----------|----------|----------|----------|
| 01       | I often find new and interesting subjects in my work       |          |          |          |          |          |
| 02       | I can handle the pressure at work well                     |          |          |          |          |          |
| 03       | During my work, I often feel emotionally drained           |          |          |          |          |          |
| 04       | Over time, I feel detached from my work                    |          |          |          |          |          |
| 05       | After work, I have enough energy for my leisure activities |          |          |          |          |          |
| 06       | This is the only type of work I can imagine doing          |          |          |          |          |          |
| 07       | Overall, I can manage the amount of work I have well       |          |          |          |          |          |
